# Supplementary material for: Identification of four compounds as potential inhibitory agents for SARS-CoV-2 spike protein
Source: Research Square preprint supplement (doi:10.21203/rs.3.rs-7896022/v1), 2025-11-28
Supplement: Supplementary file 1 [file f59882ad34cf2e756b093a7a.pdf]

A

## BZ &amp; 2019-nCoV S-RBD

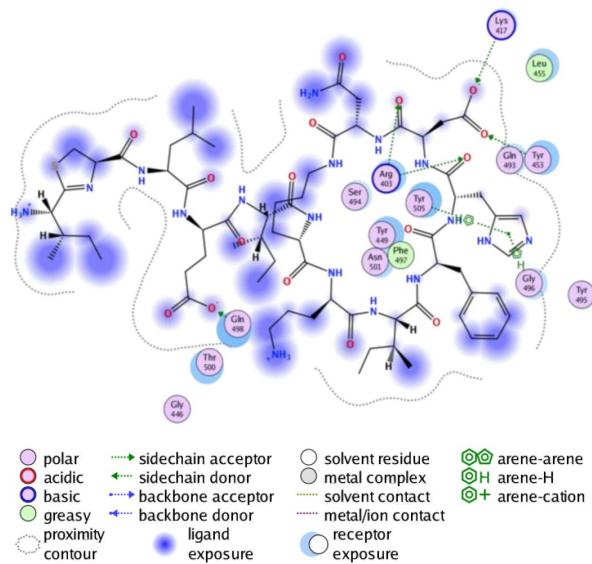

B

## Ang II &amp; 2019-nCoV S-RBD

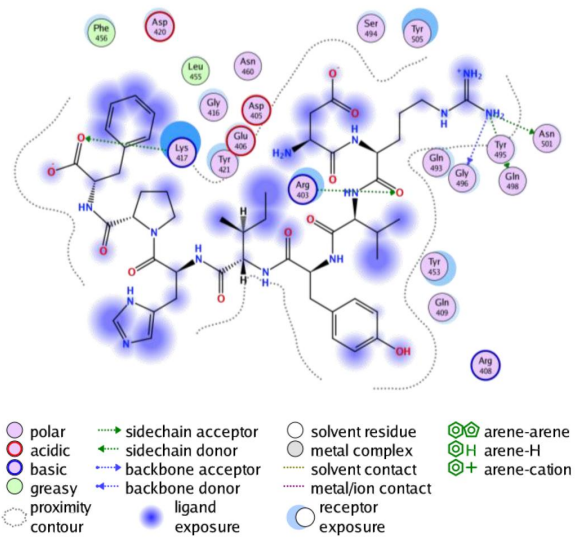

**Supplementary Fig. 1.** Molecular docking of two compounds with 2019-nCoV S-RBD.

Two-dimensional diagram illustrates the interactions between (A) Bacitracin Zinc (BZ) and (B) Angiotensin II Human Acetate (Ang II) with the 2019-nCoV S-RBD.

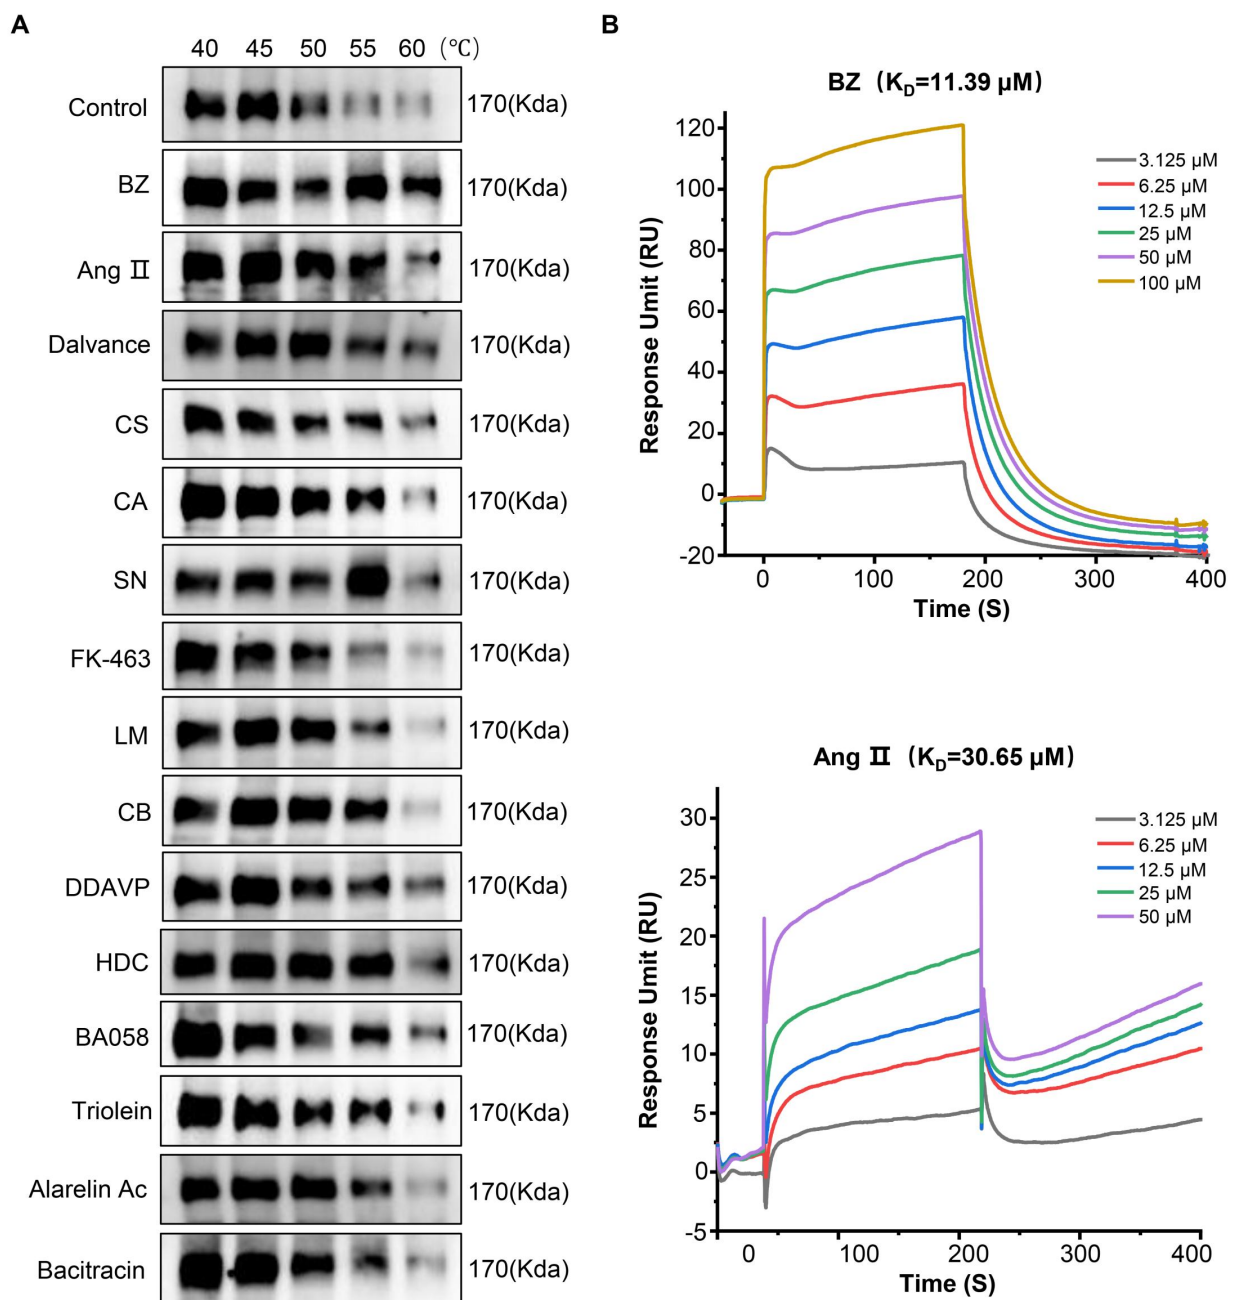

**Supplementary Fig. 2.** Compounds bind to 2019-nCoV S-RBD.

CETSA analysis of the 2019-nCoV S protein was performed using HEK293T cell lysates. The lysates were then incubated with **(A)** 100  $\mu\text{M}$  15 compounds and subsequently analyzed by Western blotting. The 2019-nCoV S-RBD was immobilized on a CM5 sensor chip using the Biacore 8K instrument. The association and dissociation curves for **(B)** two compounds are shown. The compounds were tested at various concentrations, and the  $K_D$  values were determined by fitting the data to a 1:1 binding model using Biacore Insight Evaluation Software.  $K_D$  represents the equilibrium dissociation constant.

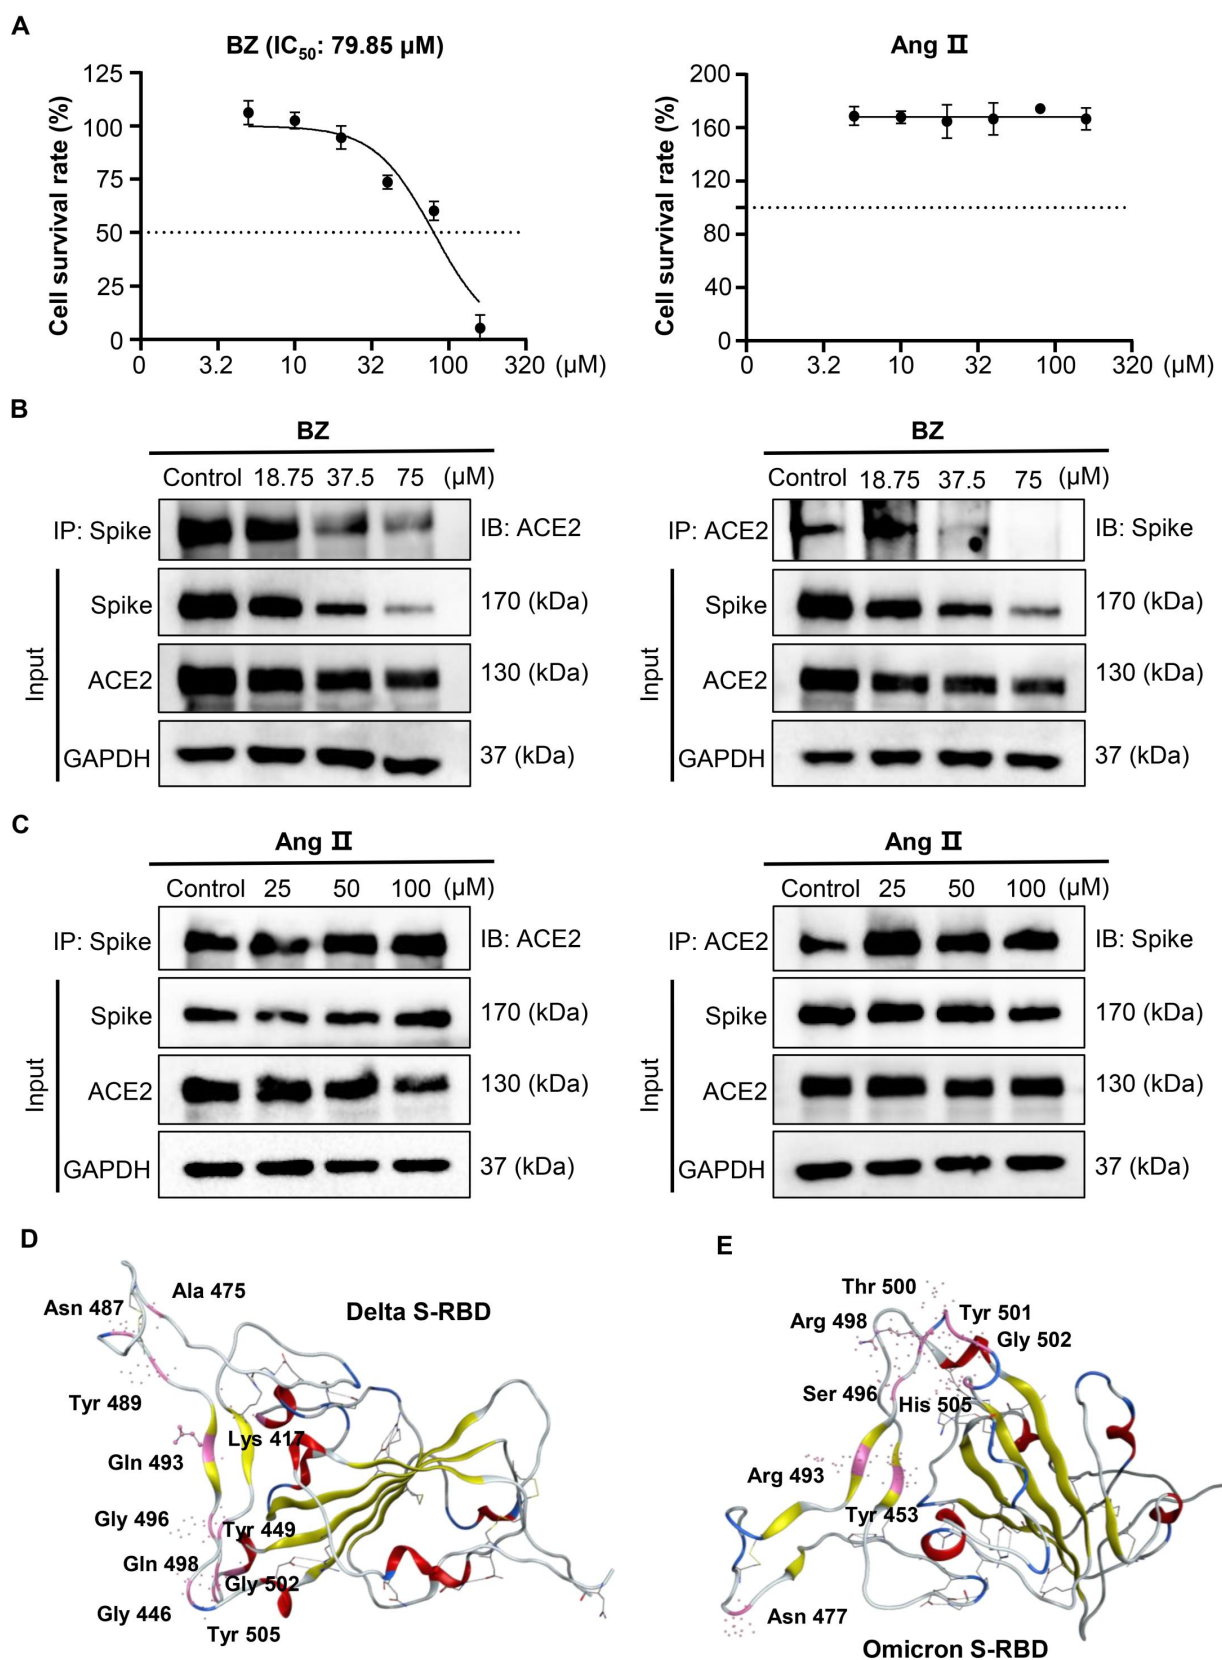

### Supplementary Fig. 3.

The cytotoxicity of **(A)** BZ or Ang II was assessed in HEK293T cells, with  $IC_{50}$  values measured at 24 hours. Co-immunoprecipitation (Co-IP) assays were performed to investigate the interaction between SARS-CoV-2 Spike protein and hACE2 in HEK293T cells. Cells were treated with **(B)** BZ or **(C)** Ang II for 24 hours. Immunoprecipitation was carried out using anti-hACE2 or anti-Spike antibodies, followed by immunoblotting with antibodies against hACE2, Spike, and GAPDH. Crystal structure of the **(D)** Delta S-RBD and **(E)** Omicron S-RBD. The binding sites of S-RBD with hACE2 are shown in pink.

**Supplementary table1. Report on residues involved in the interaction of two compounds**

| Compound | Ligand                     | Receptor<br>(S-RBD) | Interaction | E<br>(kcal/mol) |
|----------|----------------------------|---------------------|-------------|-----------------|
| BZ       | -COOH                      | Gln 498             | H-acceptor  | -0.7            |
|          | -CONH-                     | Arg 403             | H-acceptor  | -3.3            |
|          | -COOH                      | Lys 417             | H-acceptor  | -0.5            |
|          | -COOH                      | Tyr 453             | H-acceptor  | -2.6            |
|          | -C3H4N2                    | Gly 496             | Π-H         | -2.0            |
|          | -C3H4N2                    | Tyr 505             | Π-H         | -1.3            |
| Ang II   | -NHC (=NH) NH <sub>2</sub> | Gly 496             | H-donor     | -1.4            |
|          | -NHC (=NH) NH <sub>2</sub> | Gln 498             | H-donor     | -2.6            |
|          | -NHC (=NH) NH <sub>2</sub> | Asn 501             | H-donor     | -1.5            |
|          | -COOH                      | Lys 417             | H-acceptor  | -1.0            |
|          | -CONH-                     | Arg 403             | H-acceptor  | -3.3            |

**Supplementary table2. Report on molecular docking scores and interacting residues for 5 compounds**

| Compound | Docking score (s) | Receptor | Interaction |            |
|----------|-------------------|----------|-------------|------------|
| ATOP     | -7.23             | Delta    | Gly 496     | H-acceptor |
|          | -7.70             | Omicron  | Ser 496     | H-acceptor |
|          |                   |          | Arg 498     | H-acceptor |
|          |                   |          | Tyr 501     | Π-H        |
|          |                   |          | His 505     | Π-H        |
| CTM-HCI  | -7.52             | Delta    | Asn 501     | H-donor    |
|          |                   |          | Tyr 505     | H-donor    |
|          |                   |          | Thr 500     | H-donor    |
|          |                   |          | Asp 405     | Ionic      |
|          |                   |          | Gly 502     | Π-H        |
|          |                   |          | Tyr 505     | Π-H        |
|          | -7.39             | Omicron  | Arg 403     | Π-H        |
|          |                   |          | Tyr 501     | Π-H        |
| Melittin | -12.13            | Delta    | Lys 478     | H-acceptor |
|          |                   |          | Asn 481     | H-acceptor |
|          |                   |          | Phe 486     | H-acceptor |
|          |                   |          | Cys 488     | H-donor    |
|          |                   |          | Gln 498     | H-donor    |
|          |                   |          | Thr 500     | H-donor    |
|          | -15.76            | Omicron  | Leu 455     | H-donor    |
|          |                   |          | Asn 477     | H-donor    |
|          |                   |          | Gly 476     | H-donor    |
|          |                   |          | Ser 496     | H-acceptor |
| TEC      | -8.62             | Delta    | His 505     | Π-H        |
|          |                   |          | Tyr 449     | Π-H        |
|          |                   |          | Leu 455     | Π-H        |
|          | -9.14             | Omicron  | Asn 501     | H-donor    |
|          |                   |          | Arg 403     | H-donor    |
|          |                   |          | Tyr 449     | H-acceptor |
|          |                   |          | Ser 496     | H-acceptor |
|          |                   |          | His 505     | Π-H        |
